# Supplementary material for: Molecular dynamics simulations give insight into d-glucose dioxidation at C2 and C3 by Agaricus meleagris pyranose dehydrogenase
Source: PubMed Central journal article supplement (PMC3657087; doi:10.1007/s10822-013-9645-7), 2013-04-17

# Supplementary Content

## Molecular dynamics simulations give insight into D-glucose dioxidation at C2 and C3 by *Agaricus meleagris* pyranose dehydrogenase

Michael M. H. Graf <sup>a,1</sup>, Urban Bren <sup>b,c,1</sup>, Dietmar Haltrich <sup>a</sup>, Chris Oostenbrink <sup>b,†</sup>

<sup>1</sup> The first and second authors contributed equally to this work.

<sup>a</sup> Food Biotechnology Laboratory, Department of Food Science and Technology, University of Natural Resources and Life Sciences (BOKU), Muthgasse 18, AT-1190 Vienna, Austria.

<sup>b</sup> Institute of Molecular Modeling and Simulation, BOKU, University of Natural Resources and Life Sciences, Muthgasse 18, AT-1190 Vienna, Austria.

<sup>c</sup> Laboratory for Molecular Modeling, National Institute of Chemistry, Hajdrihova 19, SI-1001 Ljubljana, Slovenia.

† Corresponding author. Tel.: +43 1 47654 8302; fax: +43 1 47654 8309. E-mail address: [chris.oostenbrink@boku.ac.at](mailto:chris.oostenbrink@boku.ac.at) (C. Oostenbrink).

**Supplementary Fig. S1** Root-mean-square deviation (RMSD) of the backbone during the 10 ns MD simulations of systems PN\_A, PN\_B, NP\_A, NP\_B, PP\_A, PP\_B and PDH. Coloring scheme: run 1 (black), run 2 (red), run 3 (green), run 4 (blue).

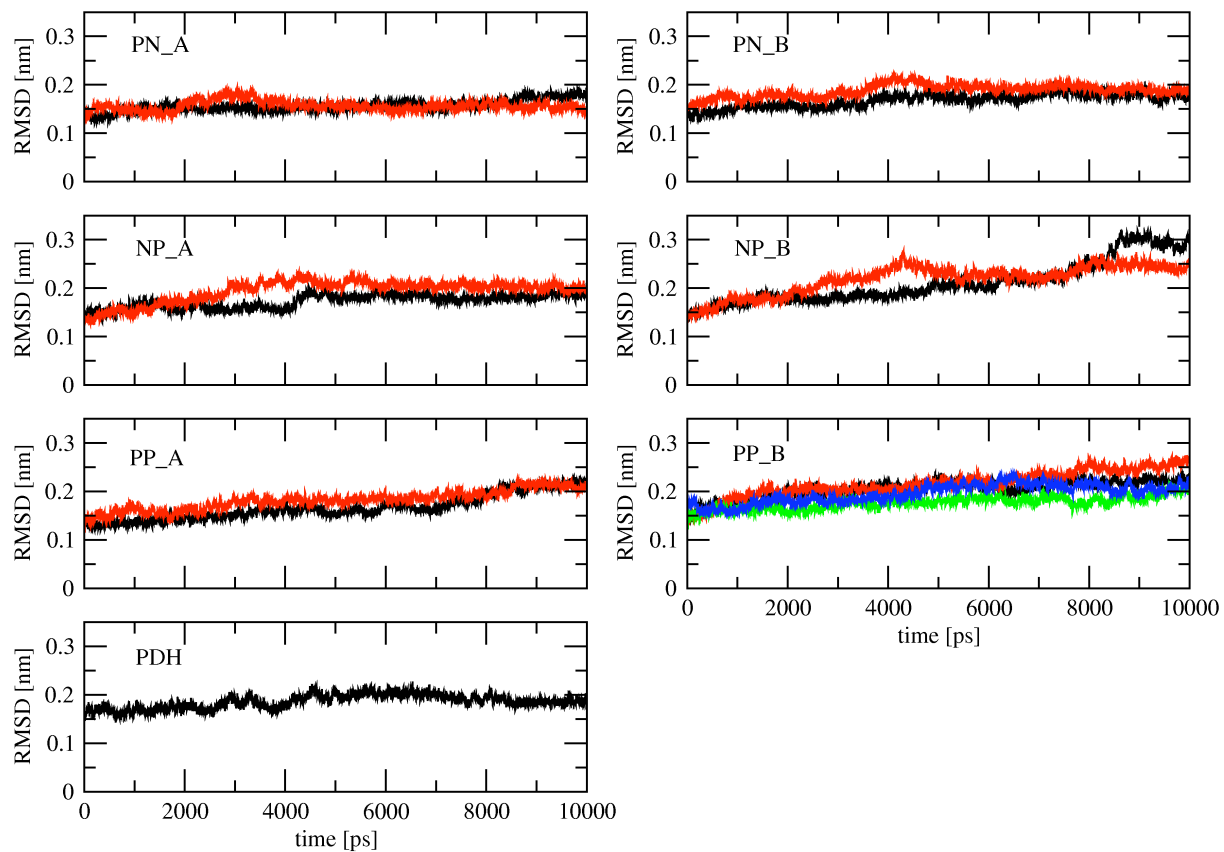

**Supplementary Fig. S2** Secondary structure elements (DSSP) classification as a function of time for selected simulations.

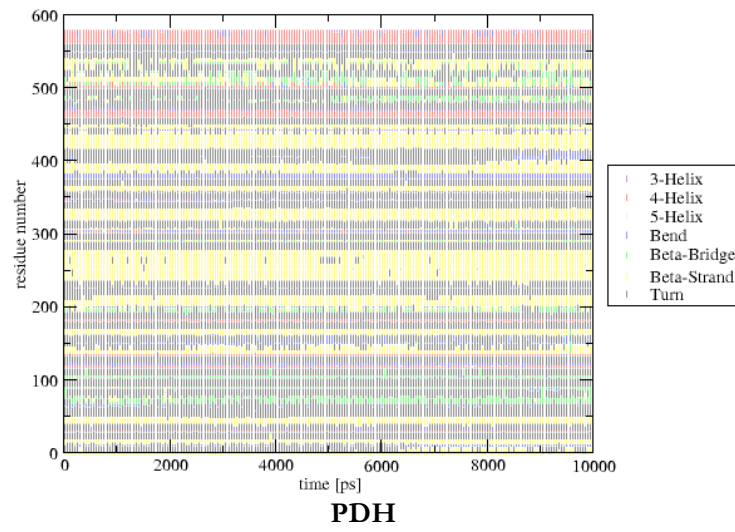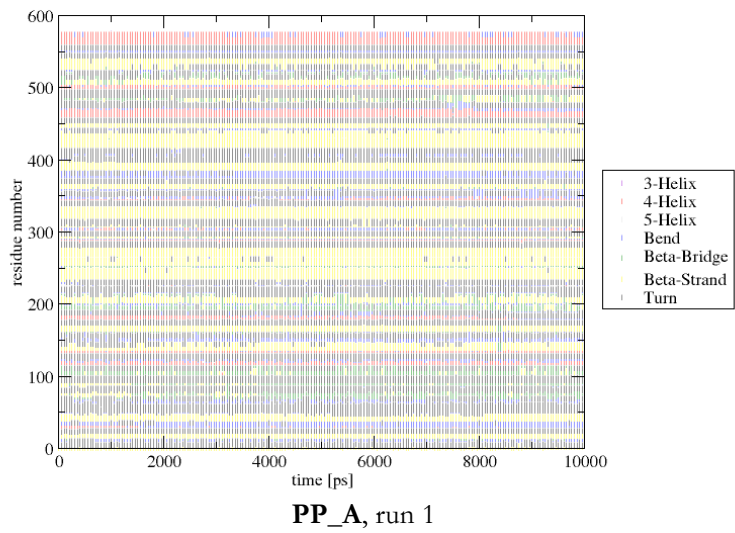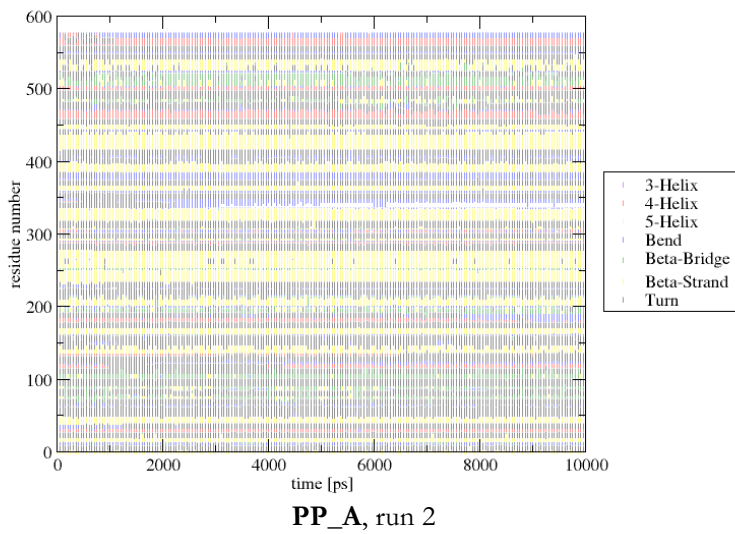

**Supplementary Fig. S3** Atom-positional root-mean-square fluctuations (RMSF) for the individual simulations. The average of the simulation curves yields the curve in figure 2 of the main manuscript. The RMSF values calculated from the crystal structure B-factor values are indicated with a thicker green curve.

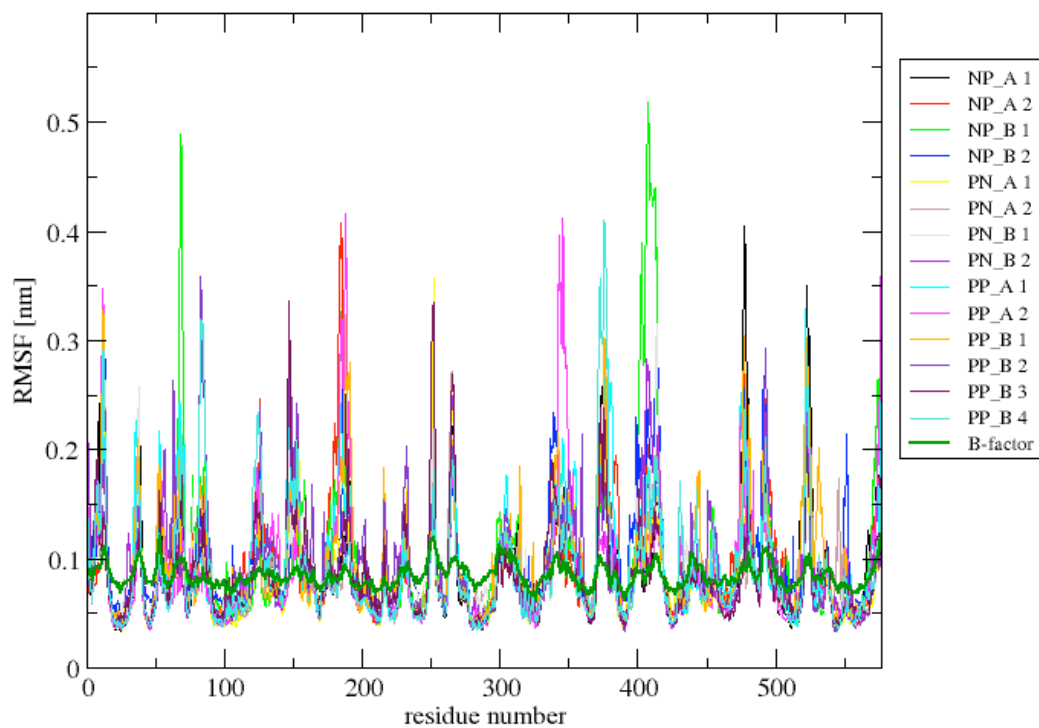

**Supplementary Fig. S4** Normalized distributions of the atom-positional root-mean-square deviation (RMSD) of D-glucose after a roto-translational fit of the protein backbone with respect to the initial structure during the 10 ns MD simulations.

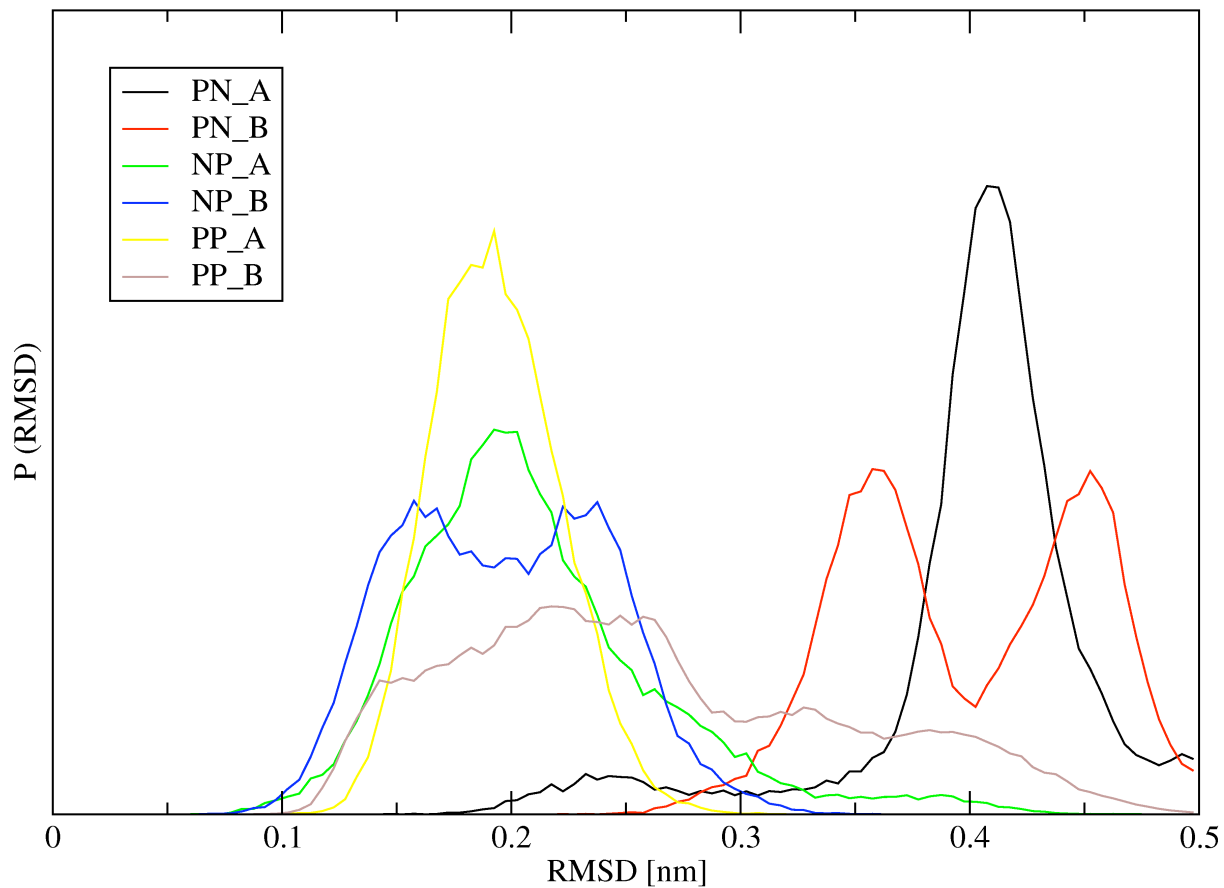

Supplement: 10822_2013_9645_MOESM1_ESM.pdf [file 10822_2013_9645_MOESM1_ESM.pdf]
